# Supplementary material for: Identification of Dysregulated microRNAs in Glioblastoma Stem-like Cells
Source: MDPI journal article supplement (doi:10.3390/brainsci13020350), 2023-02-18
Supplement: s1 [file s1]

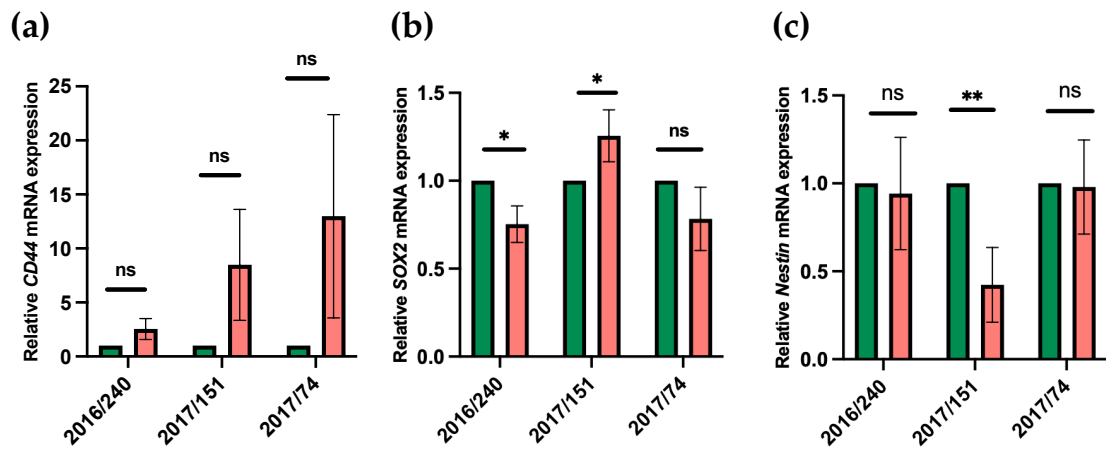

**Supplementary Figure S1. Further characterization of GSCs and differentiated astrocytic tumor cells.** Relative mRNA expression levels of *CD44* (a), *SOX2* (b), and *Nestin* (c) were calculated via RT-qPCR. Green Bars represent the GSC lines, and differentiated astrocytic tumor cells are shown as red bars. For *CD44*, two, for *SOX2* and *Nestin*, three independent experiments were performed in triplicates. Mean values  $\pm$  SD are shown. Paired students *t*-tests were applied to determine significance with ns  $p > 0.05$ , \*  $p < 0.05$ , and \*\*  $p < 0.01$ .

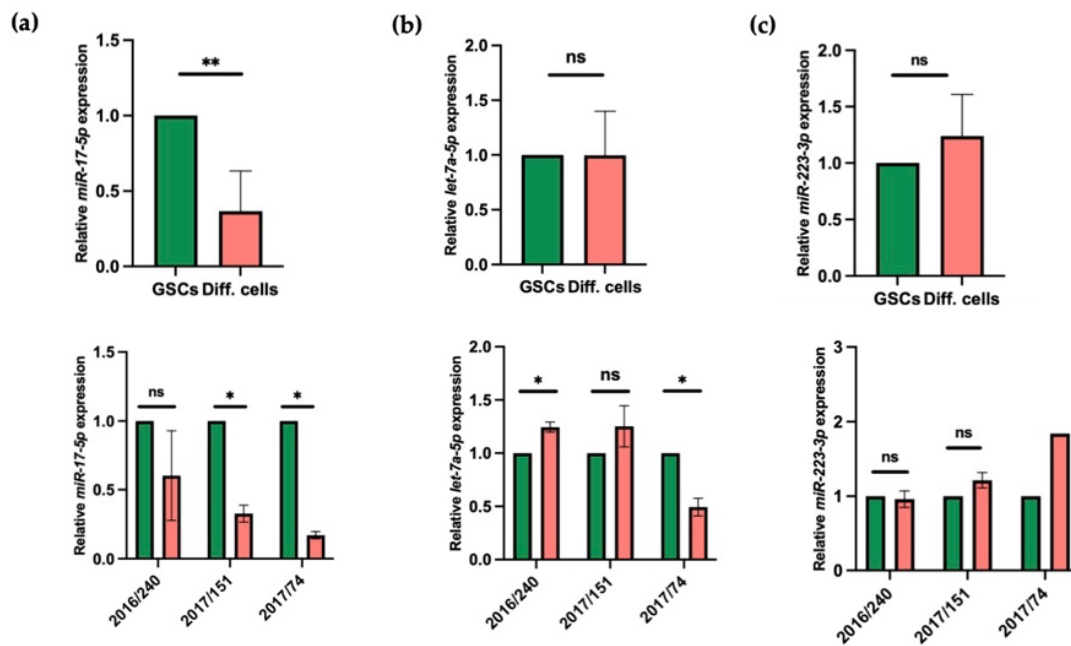

**Supplementary Figure S2. Verification of three dysregulated miRNAs in three GSC-lines.** (a) MiR-17-5p is upregulated in all three GSC-lines (indicated in green) in comparison with differentiated cells lines (indicated in red). UniSp6 was used for normalization. Two independent experiments were conducted. (b) Let-7a-5p expression in three GSC-lines (green bars) and corresponding differentiated, astrocyte cells (red bars). Two independent experiments were conducted. miR-24-5p was used as a housekeeping miRNA. (c) MiR-223-2p expression in GSCs (green) and differentiated tumor cells (red). In case of 2016/240 and 2017/151 two independent experiments were conducted and in case of 2017/74 results of one experiment are demonstrated. miR-24-5p was used as a housekeeping miRNA. Results are given as mean  $\pm$  SD. A paired students t-test was applied to determine significance: ns  $p > 0.5$ , \*  $p < 0.05$ , and \*\*  $p < 0.01$ .
